# Supplementary material for: miR-196a-5p-Rich Extracellular Vesicles from Trophoblasts Induce M1 Polarization of Macrophages in Recurrent Miscarriage
Source: Hindawi journal article supplement (doi:10.1155/2022/6811632), 2022-05-23
Supplement: f4 [file 6811632.f4.pdf]

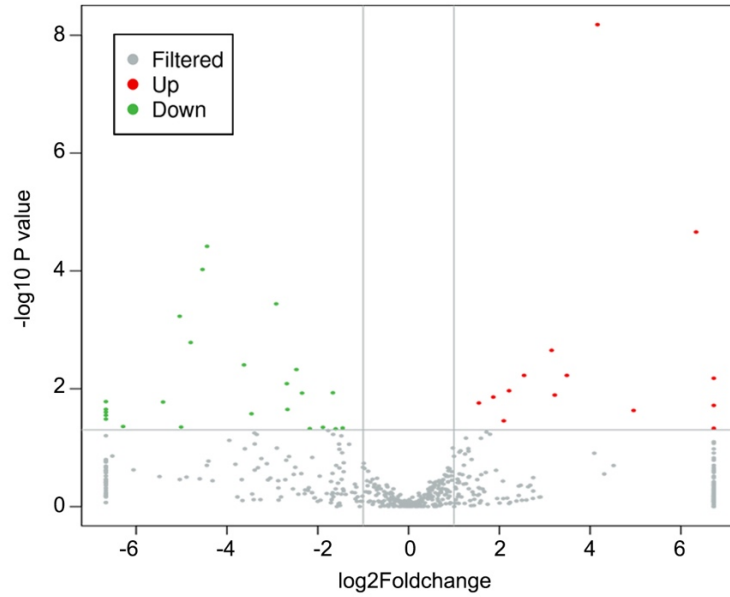

**Figure S1 Differential expression analysis based on miRNA-seq of three RM and three healthy control cases.** Volcano plot showing the differentially expressed miRNAs between the villous tissues of three RM and three healthy control cases. RM, recurrent miscarriage.

| Score      | Relative Score | RBP Name | Start | End | Matching sequence |
|------------|----------------|----------|-------|-----|-------------------|
| 7.7798874  | 75%            | ZRANB2   | 2     | 7   | AGGUAG            |
| 7.1355048  | 72%            | HNRNPA1  | 1     | 6   | UAGGUA            |
| 4.40359056 | 100%           | ELAVL1   | 7     | 10  | GUUU              |

(a)

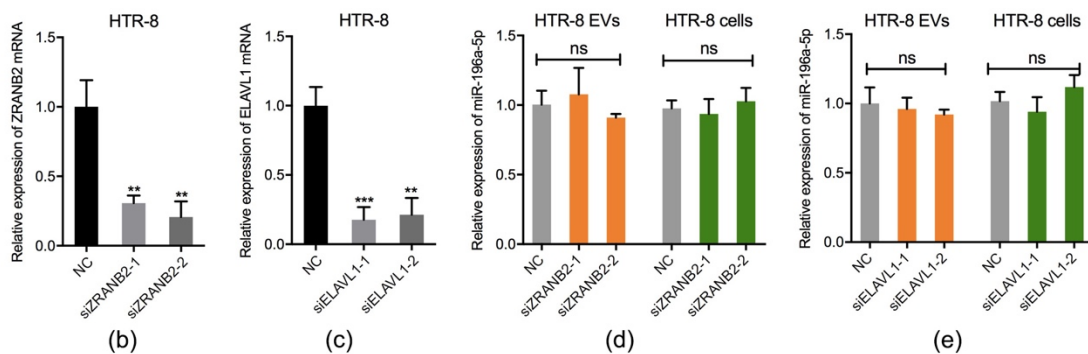

**Figure S2 Predicted RNA binding proteins associated with miR-196a-5p.** (a) Predicted RNA-binding proteins according the database of RBP specificities (RBPDB, threshold 0.7). (b-c) The mRNA expression levels of ZRANB2 or ELAVL1 were measured using RT-qPCR in HTR-8 cells transfected with siZRANB2 or siELAVL1.

(d-e) qPCR analysis of miR-196a-5p expression levels in HTR-8 cell derived-EVs and the HTR-8 cells after transfection with siZRANB2 or siELAVL1. (\*\* $p < 0.01$ ; \*\*\* $p < 0.001$ ; ns not significant).

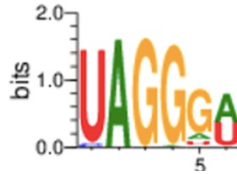

**Figure S3 Predicted hnRNPA1 binding site on miR-196a-5p.** The schematic diagram of hnRNPA1 binding site on miR-196a-5p.

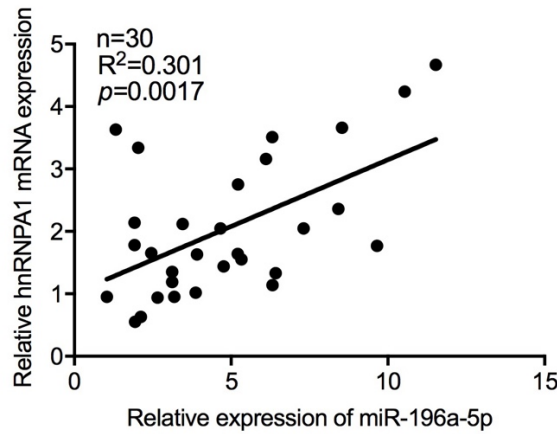

**Figure S4 The expression of hnRNPA1 was positively associated with miR-196a-5p in 30 cases RM villous tissues.** The correlation analysis between the expression of hnRNPA1 mRNA and miR-196a-5p in 30 cases RM villous tissues.

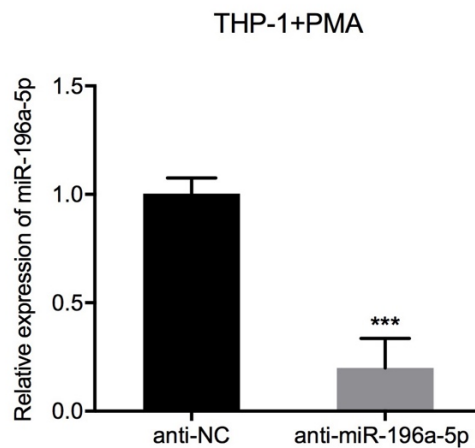

**Figure S5 miR-196a-5p was downregulated in PMA-pretreated THP-1 cells after transfection with anti-miR-196a-5p.** qPCR analysis of the expression of miR-196a-5p in PMA-pretreated THP-1 cells after transfection with anti-miR-196a-5p. PMA, phorbol 12-myristate 13-acetate.
